# Supplementary material
Source: Springer Nature journal article supplement (https://www.springermedizin.de/resource/supplementary/12931_2013_1507_MOESM10_ESM.pdf/9426356)

# A Smooth muscle actin

Wild type

Rac2<sup>-/-</sup>

Saline

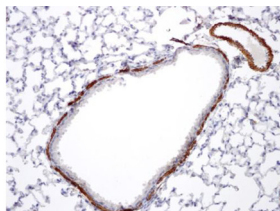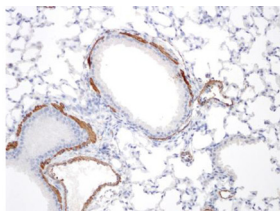

BLM

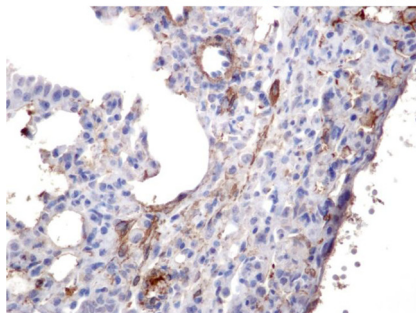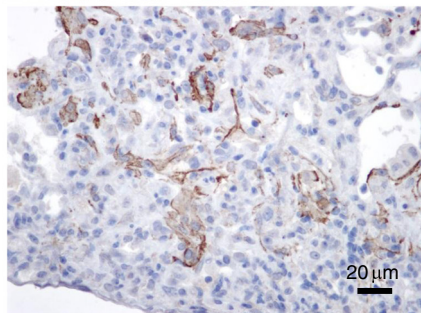

# B TGFβ

Wild type

Rac2<sup>-/-</sup>

BLM

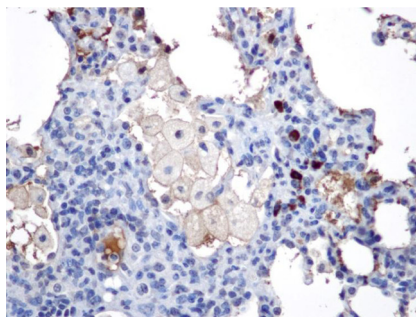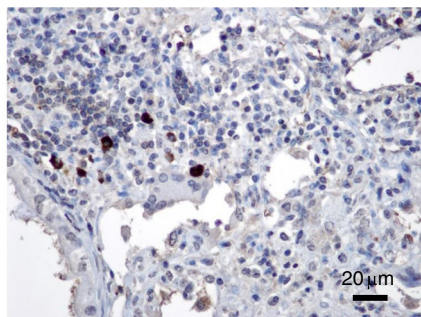

Supplement: MOESM10 [file 9426356]
